# Supplementary material for: Bimodular Antiparallel G-Quadruplex Nanoconstruct with Antiproliferative Activity
Source: PubMed Central journal article supplement (PMC6803823; doi:10.3390/molecules24193625), 2019-10-08
Supplement: molecules-24-03625-s001.pdf [file molecules-24-03625-s001.pdf]

**Supplementary Information**
**Table S1. Circular dichroism melting temperatures and percentage of folded fraction at 37°C for DNA oligonucleotides under study**

| No. | Name           | Circular Dichroism T <sub>m</sub> , °C | Percentage of folded ODN at 37°C, % |
|-----|----------------|----------------------------------------|-------------------------------------|
| 1   | HD1            | 39.2 [1], 49.1 [2]                     | >50%                                |
| 2   | biHD1          | 32 [1]                                 | <50%                                |
| 3   | biHD1-C3       | 37                                     | 50                                  |
| 4   | biHD1+Ba       | -                                      | -                                   |
| 5   | biHD1-T4A,T20A | 39                                     | 61                                  |
| 6   | biHD1-5'-Δ2G   | 35                                     | 47                                  |

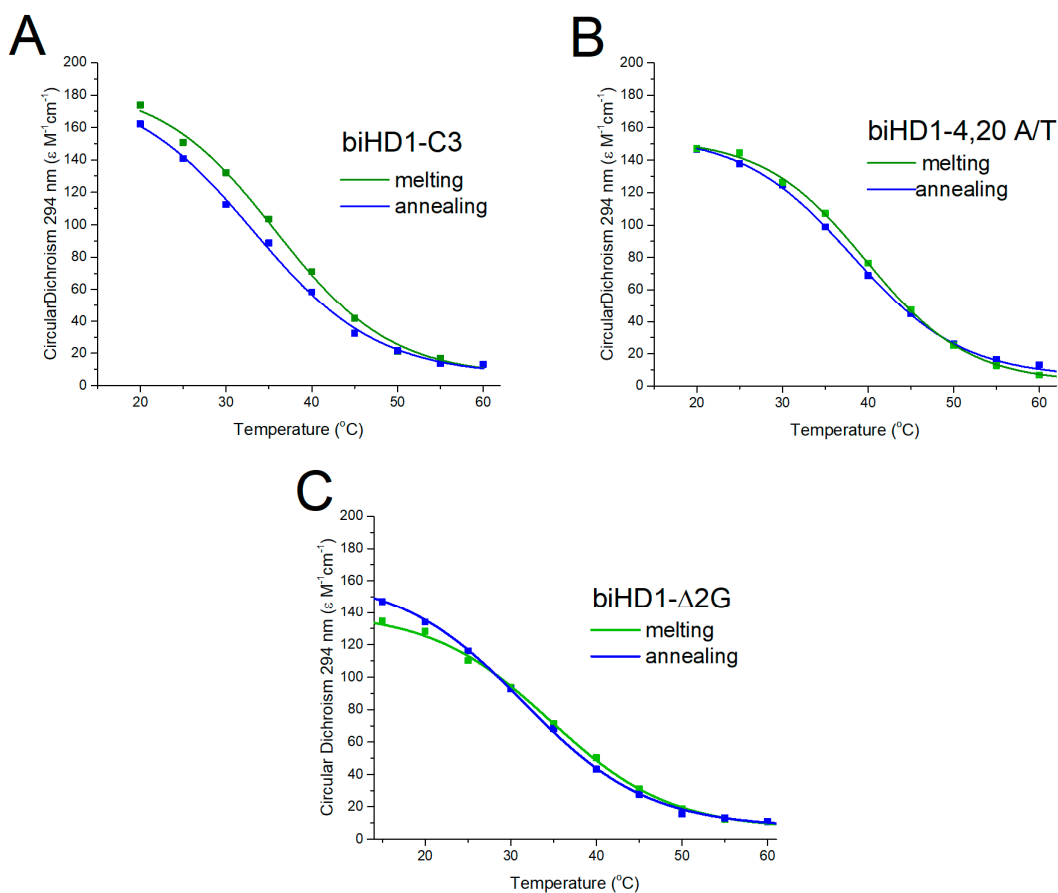

**Figure S1.** CD-melting (green) and annealing (blue) curves are plotted as functions of biHD1-T4A,T20A (A), biHD1-C3 (B) and biHD1-Δ2G (C) amplitude at 294 nm of temperature. CD data were recorded in a cuvette with a path length of 1 cm in the temperature range of 20–70°C with a scan rate of 30°C/h at 2.5 μM ODN strand concentration in working buffer solution (10 mM NaH<sub>2</sub>PO<sub>4</sub>/Na<sub>2</sub>HPO<sub>4</sub>, 10 mM KCl, 140 mM NaCl, pH 7.5).

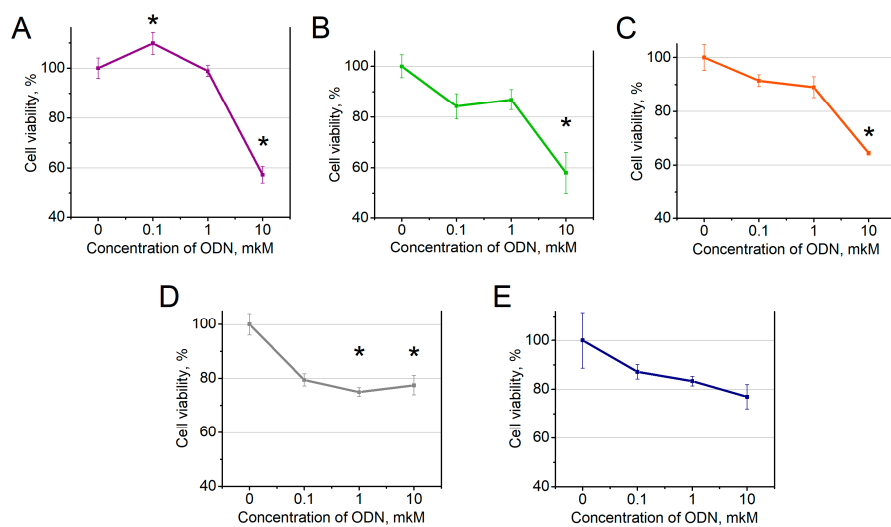

**Figure S2.** MTT test results of biHD1 treatment for different cell lines: **A** - HeLa, **B** - HCT116, **C** - MCF7, **D** - mS, **E** - PC3. Cells were incubated for 72 hr without oligonucleotide, with 0.10  $\mu$ M, 1.0  $\mu$ M, and 10  $\mu$ M biHD1 oligonucleotide. Data are presented as mean  $\pm$  S.D. Asterisk -  $p < 0.05$  compared with control (w/o oligo).

**Table S2.** Investigation of biHD1 IC50 for different cell lines

| Cell Line | biHD1 IC50, $\mu$ M |
|-----------|---------------------|
| RL-67     | 1                   |
| U87       | 7                   |
| HeLa      | >10                 |
| HCT116    | >10                 |
| MCF7      | >10                 |
| mS        | >10                 |
| PC3       | >10                 |
| hEF       | >10                 |

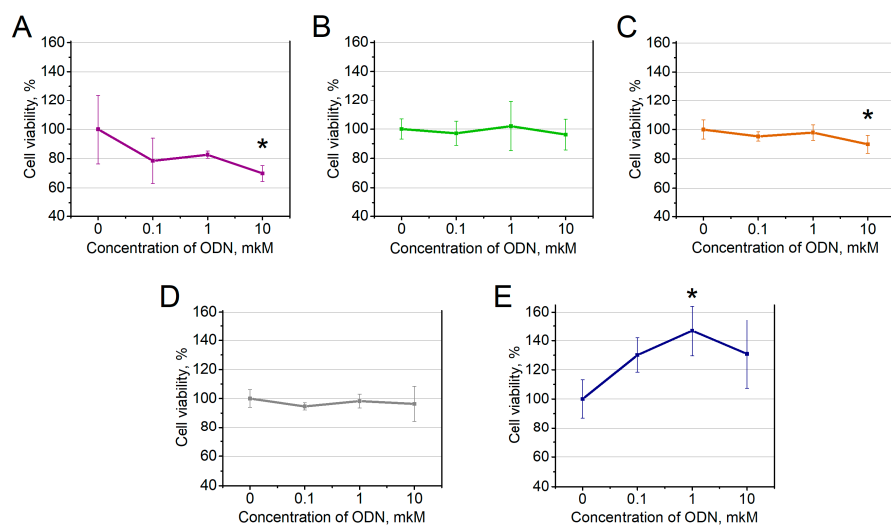

**Figure S3.** MTT test results of biHD1-C3 treatment for different cell lines: **A** - HeLa, **B** - HCT116, **C** - MCF7, **D** - mS, **E** - PC3. Cells were incubated for 72 hr without oligonucleotide, with 0.10  $\mu\text{M}$ , 1.0  $\mu\text{M}$ , and 10  $\mu\text{M}$  biHD1-C3. Data are presented as mean  $\pm$  S.D. Asterisk -  $p < 0.05$  compared with control (w/o oligo).

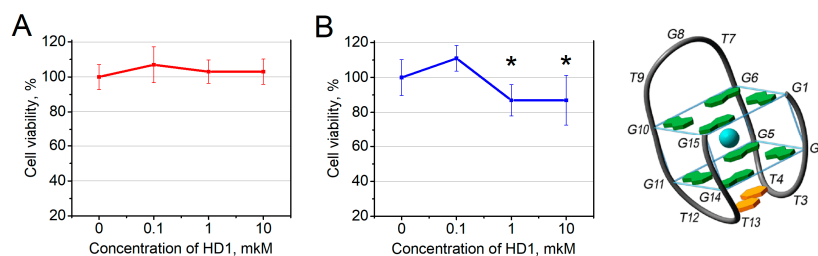

**Figure S4.** MTT test results for U87 (A) and embryo fibroblast (B) cell lines after 72 hr incubation of cells with different concentrations of single-modular HD1: control experiment without oligonucleotide, 0.10  $\mu\text{M}$  HD1, 10  $\mu\text{M}$  oligonucleotide, and 10  $\mu\text{M}$  oligonucleotide. Data are presented as mean  $\pm$  S.D. Asterisk -  $p < 0.05$  compared with control (w/o oligo).

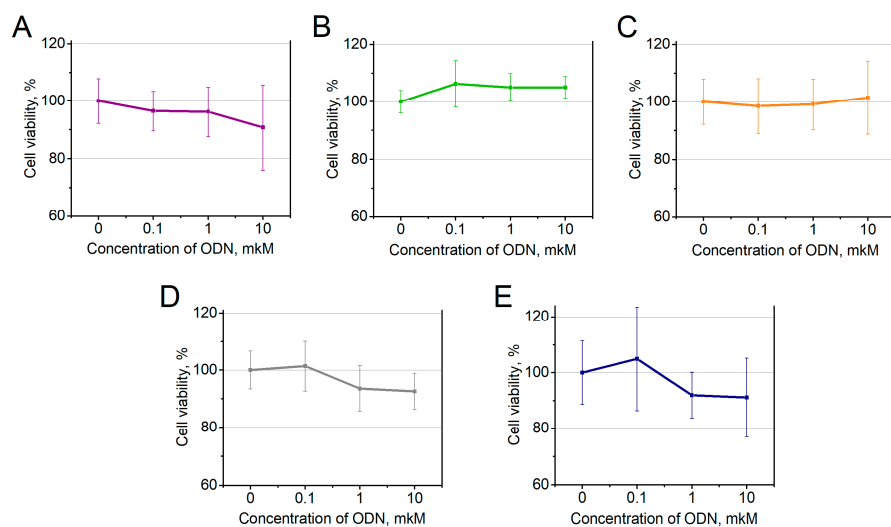

**Figure S5.** MTT test results of biHD1-A4TA20T treatment for different cell lines: **A** - HeLa, **B** - HCT116, **C** - MCF7, **D** - mS, **E** - PC3. Cells were incubated for 72 hr without oligonucleotide, with 0.10  $\mu$ M, 1.0  $\mu$ M, and 10  $\mu$ M biHD1-A4T, A20T. Data are presented as mean  $\pm$  S.D. Asterisk -  $p < 0.05$  compared with control (w/o oligo).

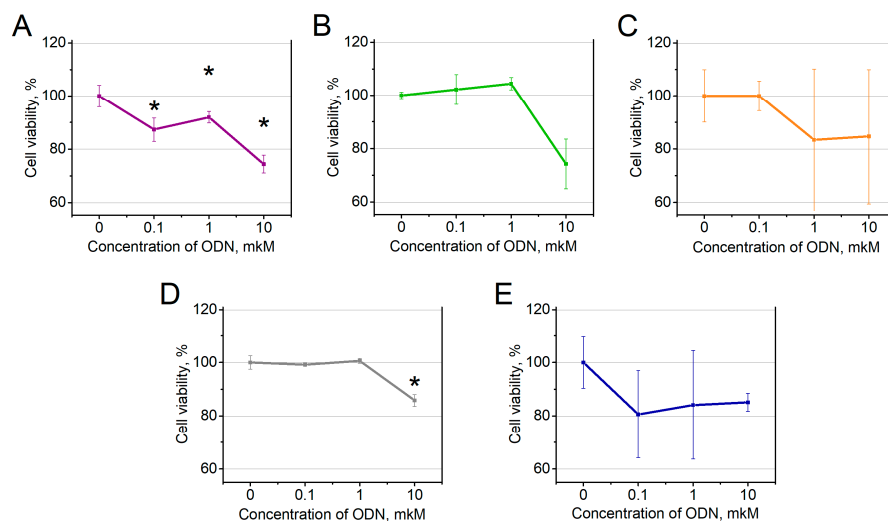

**Figure S6.** MTT test results of biHD1-5'- $\Delta$ 2G treatment for different cell lines: **A** - HeLa, **B** - HCT116, **C** - MCF7, **D** - mS, **E** - PC3. Cells were incubated for 72 hr without oligonucleotide, with 0.10  $\mu$ M, 1.0  $\mu$ M, and 10  $\mu$ M biHD1-5'- $\Delta$ 2G. Data are presented as mean  $\pm$  S.D. Asterisk -  $p < 0.05$  compared with control (w/o oligo).

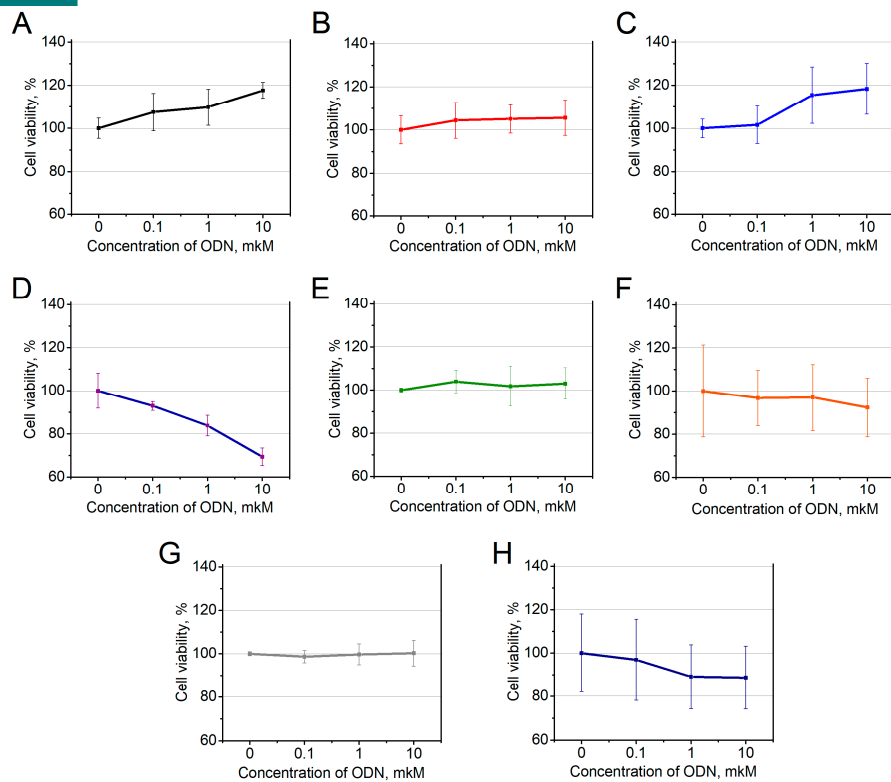

**Figure S7.** MTT test results of biHD1+Ba treatment for different cell lines: **A** - RL-67, **B** - U87, **C** - embryonic fibroblasts, **D** - HeLa, **E** - HCT116, **F** - MCF7, **G** - mS, **H** - PC3. Cells were incubated for 72 hr without oligonucleotide, with 0.10  $\mu$ M, 1.0  $\mu$ M, and 10  $\mu$ M biHD1+Ba. Data are presented as mean  $\pm$  S.D.

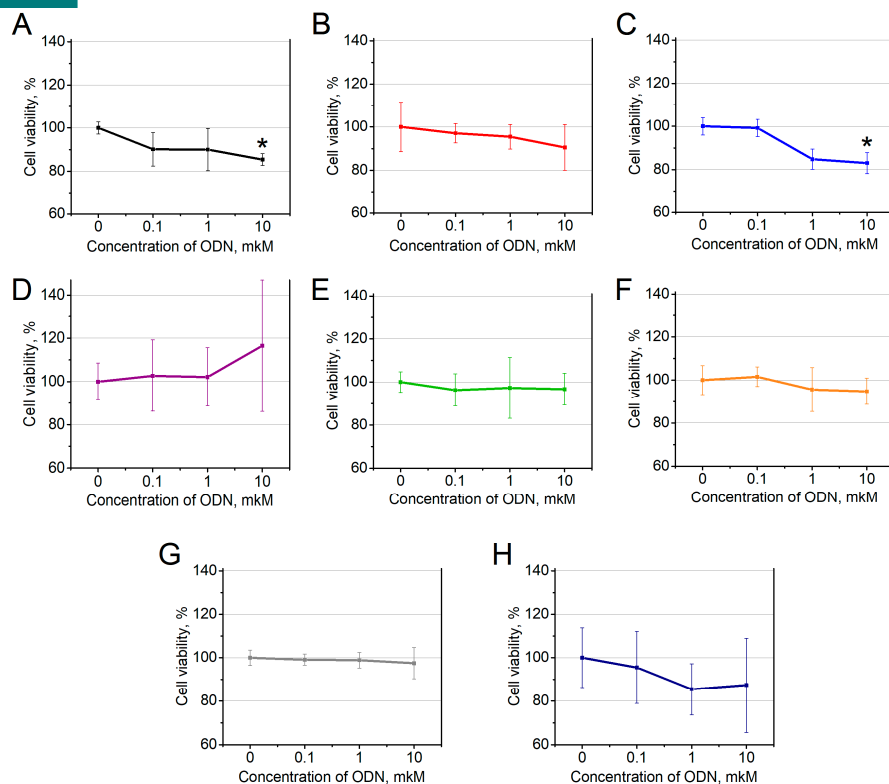

**Figure S8.** MTT test results of BaCl<sub>2</sub> treatment for different cell lines: **A** - RL-67, **B** - U87, **C** - embryonic fibroblasts, **D** - HeLa, **E** - HCT116, **F** - MCF7, **G** - mS, **H** - PC3. Cells were incubated for 72 hr without salt, with 0.20 μM, 2.0 μM, and 20 μM BaCl<sub>2</sub>. Data are presented as mean ± S.D. Asterisk - p < 0.05 compared with control (w/o oligo).

## References

- Amato, T.; Virgilio, A.; Pirone, L.; Vellecco, V.; Bucci, M.; Pedone, E.; Esposito, V.; Galeone, A. Investigating the properties of TBA variants with twin thrombin binding domains. *Sci Rep.* **2019**, *9*(1):9184. doi: 10.1038/s41598-019-45526-z.
- Zavyalova, E.G.; Legatova, V.A.; Alieva, R.S.; Zalevsky, A.O.; Tashlitsky, V.N.; Arutyunyan, A.M.; Kopylov, A.M. Putative mechanisms underlying high inhibitory activities of bimodular DNA aptamers to Thrombin. *Biomolecules.* **2019**, *9*(2), E41. doi: 10.3390/biom9020041
